# Supplementary material for: Admittance to Wildlife Rehabilitation Centres Points to Adverse Effects of Climate Change on Insectivorous Bats
Source: MDPI journal article supplement (doi:10.3390/biology12040543), 2023-04-03
Supplement: s1 [file s1]

Table S1. Availability of bat admission data used for the present study across years for four rehabilitation centres in Italy.

| <b>Rehabilitation Centre</b>                     | <b>Years covered</b>             |
|--------------------------------------------------|----------------------------------|
| Rome                                             | 2007-2021                        |
| Piacenza Wildlife Rescue Centre                  | 2016-2021                        |
| C.R.A.S. Rimini-Corpolò                          | 2009-2010, 2013-2014, 2016-2021  |
| Centro Recupero Animali Selvatici WWF Valpredina | 2000, 2002, 2004-2008, 2010-2021 |

Table S2. Summary of the number of bats (both young and adult) admitted to four Italian wildlife rehabilitation centres included in this study. Species-specific analyses were conducted only for the first four species due to their sufficient sample sizes, while the remaining species were either uncertainly classified or had small sample sizes and were therefore only included in the overall analysis of total bat numbers.

| Species                          | Total | Pups | Adults |
|----------------------------------|-------|------|--------|
| <i>Pipistrellus kuhlii</i>       | 900   | 513  | 387    |
| <i>Pipistrellus pipistrellus</i> | 60    | 34   | 26     |
| <i>Hypsugo savii</i>             | 1069  | 556  | 513    |
| <i>Tadarida teniotis</i>         | 2150  | 2066 | 84     |
| <i>Pipistrellus</i> sp.          | 1620  | 1179 | 441    |
| <i>Rhinolophus</i> sp            | 0     | 0    | 0      |
| <i>Pipistrellus nathusii</i>     | 1     | 0    | 1      |
| <i>Miniopterus schreibersii</i>  | 1     | 1    | 0      |
| <i>Eptesicus serotinus</i>       | 11    | 2    | 9      |
| <i>Plecotus auritus</i>          | 2     | 0    | 2      |
| <i>Myotis myotis</i>             | 1     | 0    | 1      |
| <i>Plecotus</i> sp.              | 8     | 4    | 4      |
| <i>Rhinolophus hipposideros</i>  | 1     | 1    | 0      |
| <i>Plecotus austriacus</i>       | 3     | 1    | 2      |
| <i>Myotis capaccinii</i>         | 2     | 0    | 2      |
| <i>Myotis myotis/blythii</i>     | 1     | 1    | 0      |
| <i>Nyctalus leisleri</i>         | 0     | 0    | 0      |
| <i>Rhinolophus euryale</i>       | 1     | 0    | 1      |
| <i>Myotis emarginatus</i>        | 1     | 0    | 1      |
| <i>Pipistrellus pygmaeus</i>     | 3     | 0    | 3      |
| <i>Myotis crypticus</i>          | 2     | 0    | 2      |
| <i>Myotis</i> sp.                | 3     | 2    | 1      |
| <i>Nyctalus lasiopterus</i>      | 1     | 0    | 1      |
| <i>Myotis daubentonii</i>        | 1     | 1    | 0      |

Table S3. Results of ALM (Automated Linear Modelling) with model selection on the total number of bats admitted to four rehabilitation centres. The response variable was the total number of bats, with centre, year, and temperature (>30°C) used as categorical and continuous predictors. Model selection was based on best subset selection and corrected Akaike Information Criterion (AICC). The table reports the presence or absence of each predictor in the final model. An "X" indicates the effect was included in the model, while a "-" indicates the effect was absent. \*\*\*/\*\*/\*: importance of variable as a predictor of admittance to centre.

| Total        |          |          |          |
|--------------|----------|----------|----------|
| AICC         | 4482.495 | 4483.820 | 4483.975 |
| Centre**     | X        | X        | X        |
| Year         | X        | -        | X        |
| Temperature* | X        | X        | X        |
| Null         | -        | -        | X        |
| Young bats   |          |          |          |
| AICC         | 4455.790 | 4457.541 | 4460.251 |
| Centre**     | X        | X        | X        |
| Year         | X        | X        | X        |
| Temperature* | X        | X        | -        |
| Null         | -        | X        | -        |
| Adults       |          |          |          |
| AICC         | 2085.310 | 2085,835 | 2091,148 |
| Centre***    | X        | X        | X        |
| Year**       | X        | X        | X        |
| Temperature* | X        | X        |          |
| Null         |          | X        |          |

Table S4. Results of ALM (Automated Linear Modelling) with model selection on the number of *Pipistrellus kuhlii* admitted to four rehabilitation centres. The response variable was the total number of bats, with centre, year, and temperature (>30°C) used as categorical and continuous predictors. Model selection was based on best subset selection and corrected Akaike Information Criterion (AICC). The table reports the presence or absence of each predictor in the final model. An "X" indicates the effect was included in the model, while a "-" indicates the effect was absent. \*\*\*/\*\*/\*: importance of variable as a predictor of admittance to centre.

| Total        |          |          |          |
|--------------|----------|----------|----------|
| AICC         | 1737,808 | 1739,777 | 1741,014 |
| Centre***    | X        | X        | X        |
| Year**       | X        | X        |          |
| Temperature* | X        | X        | X        |
| Null         |          | X        |          |
| Young bats   |          |          |          |
| AICC         | 1455,016 | 1456,661 | 1456,857 |
| Centre**     | X        | X        |          |
| Year         | -        | X        | X        |
| Temperature* | X        | X        | X        |
| Null         |          |          | X        |
| Adults       |          |          |          |
| AICC         | 400,347  | 402,024  | 402,034  |
| Centre ***   | X        | X        | X        |
| Year**       | X        | X        |          |
| Temperature* | X        | X        | X        |
| Null         |          | X        |          |

Table S5. Results of ALM (Automated Linear Modelling) with model selection on the number of *Pipistrellus pipistrellus* admitted to four rehabilitation centres. The response variable was the total number of bats, with centre, year, and temperature (>30°C) used as categorical and continuous predictors. Model selection was based on best subset selection and corrected Akaike Information Criterion (AICC). The table reports the presence or absence of each predictor in the final model. An "X" indicates the effect was included in the model, while a "-" indicates the effect was absent. \*\*\*/\*\*/\*: importance of variable as a predictor of admittance to centre.

| Total       |          |          |          |
|-------------|----------|----------|----------|
| AICC        | -1016,68 | -1016,17 | -1014,69 |
| Centre*     | X        | X        | X        |
| Year        | -        | -        | X        |
| Temperature | -        | -        | -        |
| Null        | -        | X        | -        |
| Young bats  |          |          |          |
| AICC        | -1343,36 | -1341,91 | -1341,5  |
| Centre*     | X        | X        | X        |
| Year        | -        | -        | X        |
| Temperature | -        | -        | -        |
| Null        | -        | X        | -        |
| Adults      |          |          |          |
| AICC        | -2072,09 | -2017,68 | -2070,13 |
| Centre*     | X        | X        | X        |
| Year        | X        | -        | X        |
| Temperature | -        | -        | -        |
| Null        | -        | X        | -        |

Table S6. Results of ALM (Automated Linear Modelling) with model selection on the number of *Hypsugo savii* admitted to four rehabilitation centres. The response variable was the total number of bats, with centre, year, and temperature (>30°C) used as categorical and continuous predictors. Model selection was based on best subset selection and corrected Akaike Information Criterion (AICC). The table reports the presence or absence of each predictor in the final model. An "X" indicates the effect was included in the model, while a "-" indicates the effect was absent. \*\*\*/\*\*/\*: importance of variable as a predictor of admittance to centre.

| Total         |          |          |          |
|---------------|----------|----------|----------|
| AICC          | 1639,676 | 1641,264 | 1644,006 |
| Centre***     | X        | X        | X        |
| Year**        | X        | X        |          |
| Temperature*  | X        | X        | X        |
| Null          | -        | X        | -        |
| Young bats    |          |          |          |
| AICC          | 1163,281 | 1164,386 | 1164,742 |
| Centre**      | X        | X        | X        |
| Year          |          | X        | X        |
| Temperature*  | X        | X        | X        |
| Null          | -        |          | -        |
| Adults        |          |          |          |
| AICC          | 821,549  | 822,299  | 828,122  |
| Centre ***    | X        | X        | X        |
| Year **       | X        | X        |          |
| Temperature * | X        | X        | X        |
| Null          | -        | X        | -        |

Table S7. Results of ALM (Automated Linear Modelling) with model selection on the number of *Tadarida teniotis* admitted to four rehabilitation centres. The response variable was the total number of bats, with centre, year, and temperature (>30°C) used as categorical and continuous predictors. Model selection was based on best subset selection and corrected Akaike Information Criterion (AICC). The table reports the presence or absence of each predictor in the final model. An "X" indicates the effect was included in the model, while a "-" indicates the effect was absent. \*\*\*/\*\*/\*: importance of variable as a predictor of admittance to centre.

| Total         |          |          |          |
|---------------|----------|----------|----------|
| AICC          | 4471,066 | 4417,986 | 4418,457 |
| Centre***     | X        | -        | X        |
| Year**        | X        | X        | -        |
| Temperature*  | X        | X        | X        |
| Null          | -        | -        | -        |
| Young bats    |          |          |          |
| AICC          | 4415,218 | 4416,37  | 4416,708 |
| Centre***     | X        | -        | X        |
| Year**        | X        | X        | -        |
| Temperature** | X        | X        | X        |
| Null          | -        | -        | -        |
| Adults        |          |          |          |
| AICC          | -54,41   | -52,599  | -52,575  |
| Centre**      | X        | X        | X        |
| Year*         | X        | X        | X        |
| Temperature   | -        | -        | X        |
| Null          | -        | X        | -        |
